# Supplementary material for: Astrocytic ceramide as possible indicator of neuroinflammation
Source: PubMed Central journal article supplement (PMC6388480; doi:10.1186/s12974-019-1436-1), 2019-02-25

**Methanol fixation**

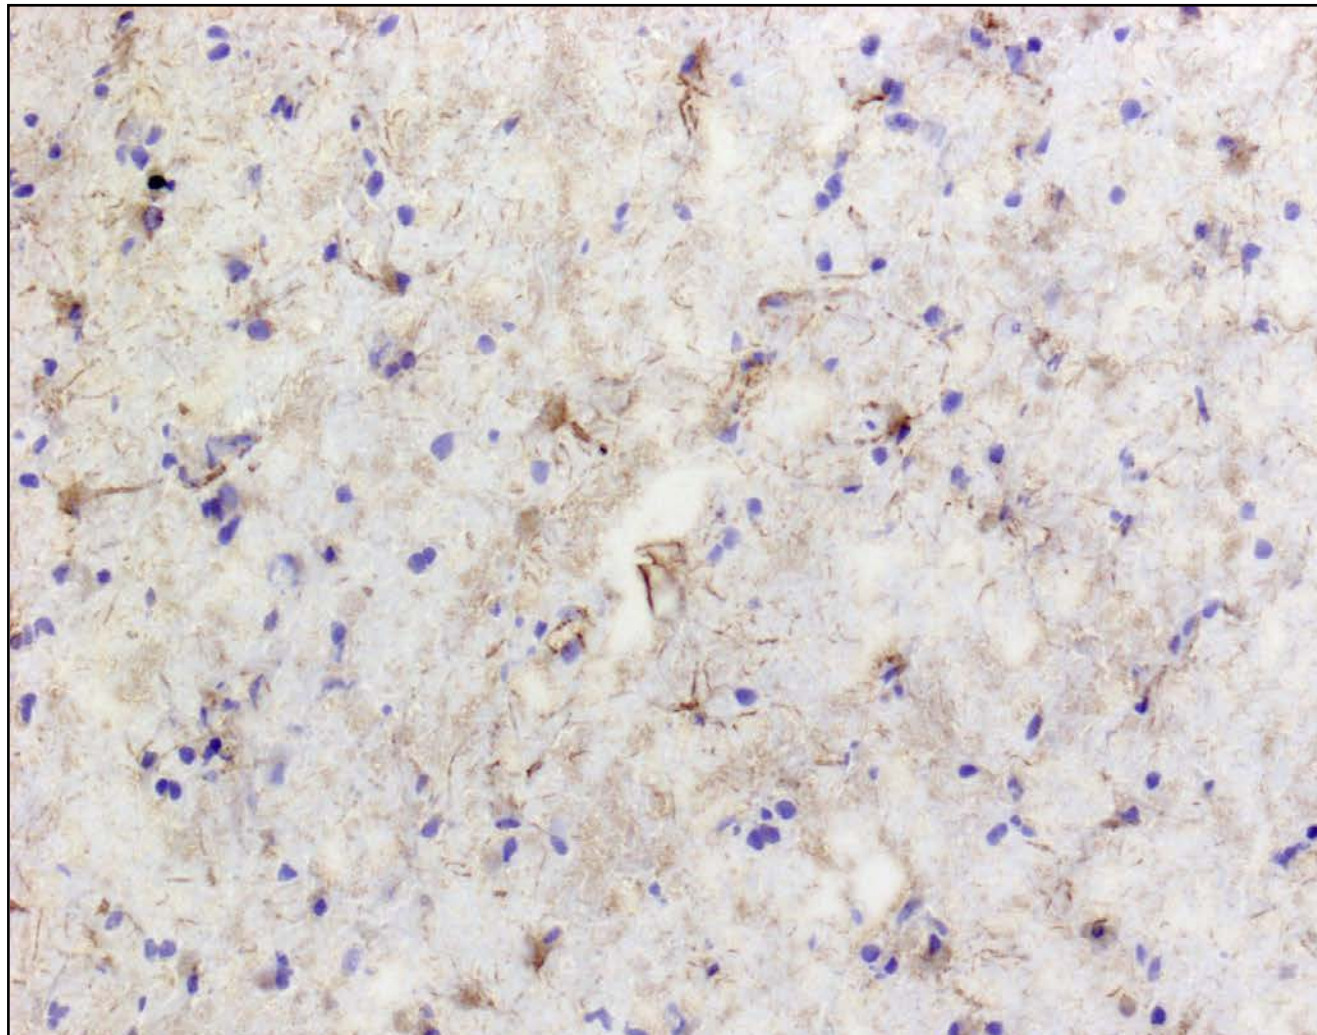

**4%PFA fixation**

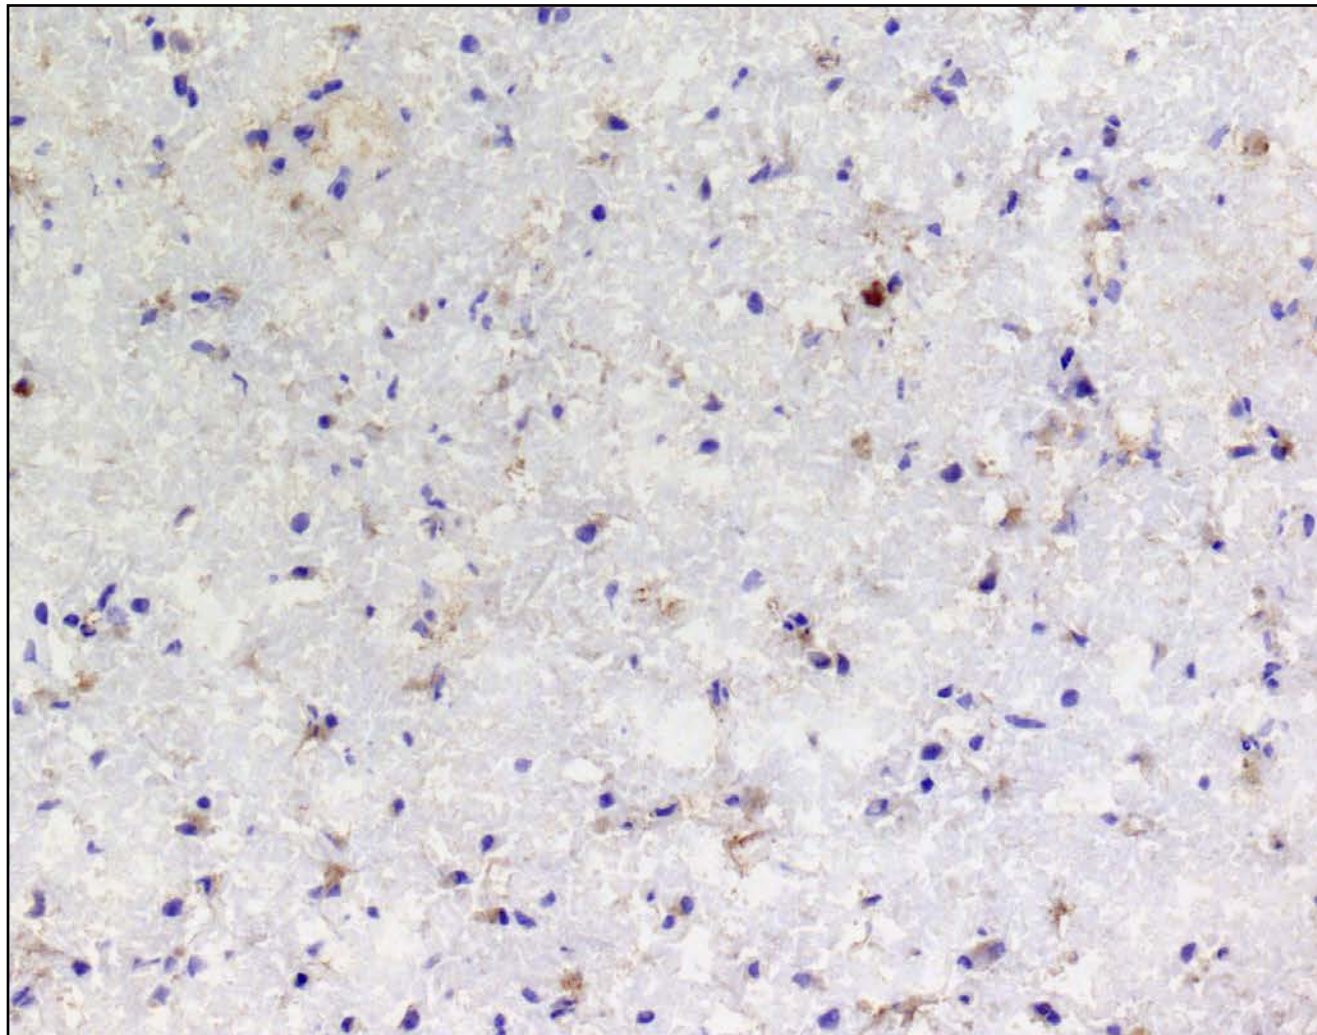

Supplement: 12974_2019_1436_MOESM1_ESM.pdf [file 12974_2019_1436_MOESM1_ESM.pdf]
